# Supplementary material for: Noninvasive Prenatal Testing: Comparison of Two Mappers and Influence in the Diagnostic Yield
Source: Hindawi journal article supplement (doi:10.1155/2018/9498140), 2018-06-07
Supplement: f1 [file 9498140.f1.pdf]

Supplementary Table 1. Demographics and pregnancy-related information for the selected samples tested.

| <b>Characteristic</b>                       | <b>Euploid (N=159)</b> | <b>Aneuploid (N=58)</b> | <b>p</b> |
|---------------------------------------------|------------------------|-------------------------|----------|
| <b>Maternal age, years (average, SD)</b>    | 35.126 ± 4.932 (N=159) | 36.190 ± 4.331 (N=58)   | P=0.126  |
| <35 (N, %)                                  | 58/159 (36.5%)         | 21/58 (36.2%)           |          |
| ≥35 (N,%)                                   | 101/159 (63.5%)        | 37/58 (63.8%)           |          |
| <b>Gestational age, weeks (average, SD)</b> | 13.90 ± 2.30 (N=159)   | 12.74 ± 1.86 (N=58)     | P<0.001  |
| <b>Racial origin (N, %)</b>                 |                        |                         | P=0.379  |
| Caucasian                                   | 137/155 (88.4%)        | 43/56 (76.8%)           |          |
| South American                              | 8/155 (5.2%)           | 11/56 (19.6%)           |          |
| Asian                                       | 5/155 (3.2%)           | 0/56 (0%)               |          |
| African                                     | 5/155 (3.2%)           | 2/56 (3.6%)             |          |
| <b>Weight, kg (average, SD)</b>             | 61.85±9.72 (N=143)     | 64.41±12.80 (N=54)      | P=0.188  |
| <b>MBI, kg/m2 (average, SD)</b>             | 23.70±6.64 (N=129)     | 24.14±4.75 (N=52)       | P=0.542  |
| <b>Current smoker (N, %)</b>                | 16/144 (11.11%)        | 4/55 (7.2%)             | P=0.385  |
| <b>Maternal diabetes mellitus (N, %)</b>    | 2/144 (1.4%)           | 0/58 (0%)               |          |
| <b>Risk of T21 †</b>                        |                        |                         | P<0.001  |
| Without risk (<1:1000)                      | 37/142 (26.1%)         | 1/53 (1.9%)             |          |
| Intermediate risk (1:1000-1:250)            | 18/142 (12.7%)         | 4/53 (7.5%)             |          |
| High risk (>1:250)                          | 87/142 (61.2%)         | 48/53 (90.6%)           |          |

|                                      |                 |               |
|--------------------------------------|-----------------|---------------|
| <b>Risk of T18 †</b>                 |                 | P<0.001       |
| Without risk (<1:1000)               | 113/126 (89.7%) | 10/50 (20.0%) |
| Intermediate risk (1:1000-1:250)     | 3/126 (2.4%)    | 2/50 (4.0%)   |
| High risk (>1:250)                   | 10/126 (7.9%)   | 38/50 (76.0%) |
| <b>Main indication (N, %)</b>        |                 | P<0.001       |
| Positive combined screening (>1:250) | 82/159 (51.6%)  | 30/58 (51.8%) |
| Abnormal fetal ultrasound scan       | 7/159 (4.4%)    | 26/58 (44.8%) |
| Positive family history              | 13/159 (8.2%)   | 0/58 (0%)     |
| Advanced maternal age                | 28/159 (17.6%)  | 1/58 (1.7%)   |
| Other or not indicated               | 29/159 (18.2%)  | 1/58 (1.7%)   |
| <b>Diagnostic procedure (N, %)</b>   |                 | P<0.001       |
| Chorionic villus sampling            | 53/159 (33.3%)  | 49/58 (84.5%) |
| Amniocentesis                        | 91/159 (57.2%)  | 9/58 (15.5%)  |
| Fetal tissues                        | 2/159 (1.3%)    | 0/58 (0%)     |
| Phenotypic features in newborn       | 13/159 (8.2%)   | 0/58 (0%)     |
| <b>Diagnostic technique</b>          |                 | P=0.018       |
| QF-PCR                               | 6/159 (3.8%)    | 4/58 (6.9%)   |
| Karyotyping                          | 0/159 (0%)      | 3/58 (5.2%)   |
| Both                                 | 140/159 (88.0%) | 51/58 (87.9%) |

|                                                |                |               |
|------------------------------------------------|----------------|---------------|
| Phenotypic features of euploid in the neonates | 13/159 (8.2%)  | 0/58 (0%)     |
| <b>Fetal sex</b>                               |                | 0.655         |
| Male                                           | 74/159 (46.5%) | 29/58 (50.0%) |
| Female                                         | 85/159 (53.5%) | 29/58 (50.0%) |

For some patients not all information was available. Number of patients used to calculate statistics is indicated for each parameter.

†Risk ratios that Hudecova defines in the study published in 2014 were used to determine the risk of aneuploidy.<sup>1</sup>

<sup>1</sup> Hudecova et al., «Maternal Plasma Fetal DNA Fractions in Pregnancies with Low and High Risks for Fetal Chromosomal Aneuploidies».
