# Supplementary material for: Noninvasive Prenatal Testing: Comparison of Two Mappers and Influence in the Diagnostic Yield
Source: Hindawi journal article supplement (doi:10.1155/2018/9498140), 2018-06-07
Supplement: f2 [file 9498140.f2.pdf]

Supplementary table 2. Cut-off values for each score obtained by ROC curves.

Z-Score

|            |               | Z-SCORE                                                                             |                                                                                       |
|------------|---------------|-------------------------------------------------------------------------------------|---------------------------------------------------------------------------------------|
|            |               | TMAP                                                                                | HPG                                                                                   |
| TRISOMY 21 |               | 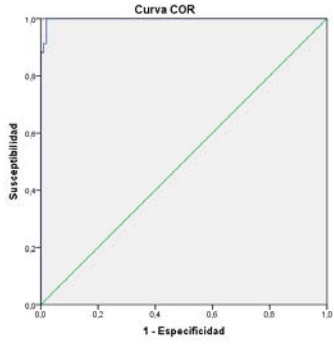   |    |
|            | AUC           | 0.998                                                                               | 0.981                                                                                 |
|            | CUT-OFF VALUE | 1.5456                                                                              | 1.9532                                                                                |
|            | SENSITIVITY   | 100%                                                                                | 100%                                                                                  |
|            | SPECIFICITY   | 98.00%                                                                              | 96.10%                                                                                |
| TRISOMY 18 |               |  |  |
|            | AUC           | 0.889                                                                               | 0.968                                                                                 |
|            | CUT-OFF VALUE | 1.0117                                                                              | 1.1774                                                                                |
|            | SENSITIVITY   | 83.30%                                                                              | 100%                                                                                  |

|            |               |                                                                                   |                                                                                     |
|------------|---------------|-----------------------------------------------------------------------------------|-------------------------------------------------------------------------------------|
|            | SPECIFICITY   | 86.40%                                                                            | 87.40%                                                                              |
| TRISOMY 13 |               | 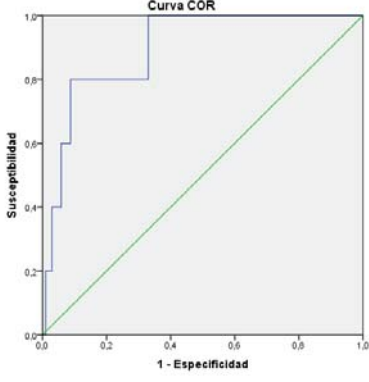 |  |
|            | AUC           | 0.897                                                                             | 0.94                                                                                |
|            | CUT-OFF VALUE | 1.1564                                                                            | 0.8283                                                                              |
|            | SENSITIVITY   | 80%                                                                               | 100%                                                                                |
|            | SPECIFICITY   | 91.30%                                                                            | 87.40%                                                                              |

Trisomy ratio

|            |     |                                                                                     |                                                                                       |
|------------|-----|-------------------------------------------------------------------------------------|---------------------------------------------------------------------------------------|
|            |     | <b>TR</b>                                                                           |                                                                                       |
|            |     | <b>TMAP</b>                                                                         | <b>HPG</b>                                                                            |
| TRISOMY 21 |     | 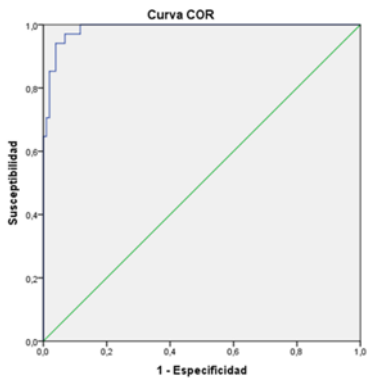 |  |
|            | AUC | 0.988                                                                               | 0.998                                                                                 |

|            |               |                                                                                     |                                                                                       |
|------------|---------------|-------------------------------------------------------------------------------------|---------------------------------------------------------------------------------------|
|            | CUT-OFF VALUE | 100.9884                                                                            | 101.2099                                                                              |
|            | SENSITIVITY   | 100%                                                                                | 100%                                                                                  |
|            | SPECIFICITY   | 88.40%                                                                              | 95.10%                                                                                |
|            |               |                                                                                     |                                                                                       |
| TRISOMY 18 |               | 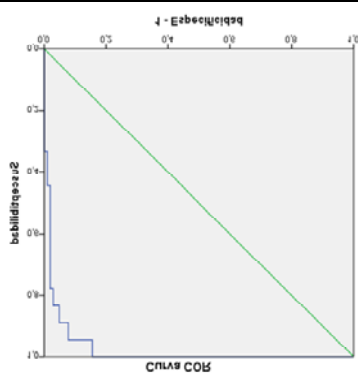   |    |
|            | AUC           | 0.975                                                                               | 0.999                                                                                 |
|            | CUT-OFF VALUE | 101.3703                                                                            | 101.4261                                                                              |
|            | SENSITIVITY   | 100%                                                                                | 100%                                                                                  |
|            | SPECIFICITY   | 84.50%                                                                              | 99.03%                                                                                |
|            |               |                                                                                     |                                                                                       |
| TRISOMY 13 |               |  |  |
|            | AUC           | 0.998                                                                               | 0.998                                                                                 |
|            | CUT-OFF VALUE | 101.2612                                                                            | 101.4996                                                                              |
|            | SENSITIVITY   | 100%                                                                                | 100%                                                                                  |
|            | SPECIFICITY   | 99%                                                                                 | 99%                                                                                   |
|            |               |                                                                                     |                                                                                       |

Fractional Genomic Representation

|            |                  | FGR                                                                                 |                                                                                       |
|------------|------------------|-------------------------------------------------------------------------------------|---------------------------------------------------------------------------------------|
|            |                  | TMAP                                                                                | HPG                                                                                   |
| TRISOMY 21 |                  | 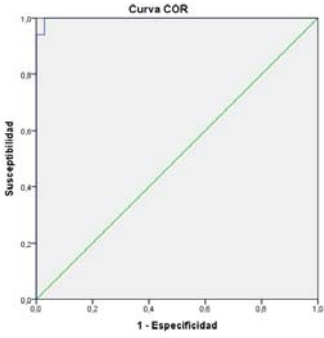   |    |
|            | AUC              | 0.998                                                                               | 0.981                                                                                 |
|            | CUT-OFF<br>VALUE | 1.8782                                                                              | 2.1542                                                                                |
|            | SENSITIVITY      | 100%                                                                                | 100%                                                                                  |
|            | SPECIFICITY      | 97.10%                                                                              | 93.20%                                                                                |
| TRISOMY 18 |                  |  |  |
|            | AUC              | 0.901                                                                               | 0.971                                                                                 |
|            | CUT-OFF<br>VALUE | 0.9522                                                                              | 3.04                                                                                  |
|            | SENSITIVITY      | 88.90%                                                                              | 100%                                                                                  |

|            |               |                                                                  |                                                                  |
|------------|---------------|------------------------------------------------------------------|------------------------------------------------------------------|
|            | SPECIFICITY   | 82.50%                                                           | 94.20%                                                           |
| TRISOMY 13 |               | <p>Curva COR</p> <p>Susceptibilidad</p> <p>1 - Especificidad</p> | <p>Curva COR</p> <p>Susceptibilidad</p> <p>1 - Especificidad</p> |
|            | AUC           | 1                                                                | 1                                                                |
|            | CUT-OFF VALUE | 6.7248                                                           | 5.1534                                                           |
|            | SENSITIVITY   | 100%                                                             | 100%                                                             |
|            | SPECIFICITY   | 99%                                                              | 100%                                                             |
