# Supplementary material for: Noninvasive Prenatal Testing: Comparison of Two Mappers and Influence in the Diagnostic Yield
Source: Hindawi journal article supplement (doi:10.1155/2018/9498140), 2018-06-07
Supplement: f3 [file 9498140.f3.pdf]

Supplementary Table 3. Sensitivity and specificity for each ratio.

|                                   | Z-SCORE |       | TR    |       | FGR   |       | TR AND Z-SCORE<br>OR FGR |       | TR AND FGR |       | TR AND Z-<br>SCORE |       | Z-SCORE AND<br>FGR |       | THREE SCORES |       |
|-----------------------------------|---------|-------|-------|-------|-------|-------|--------------------------|-------|------------|-------|--------------------|-------|--------------------|-------|--------------|-------|
|                                   | TMAP    | HPG   | TMAP  | HPG   | TMAP  | HPG   | TMAP                     | HPG   | TMAP       | HPG   | TMAP               | HPG   | TMAP               | HPG   | TMAP         | HPG   |
| SENSITIVITY FOR<br>TRISOMY 21 (%) | 91.2    | 91.2  | 94.1  | 100.0 | 91.2  | 100.0 | 97.1                     | 100.0 | 97.1       | 100.0 | 97.1               | 97.1  | 97.1               | 100.0 | 97.1         | 100.0 |
| SPECIFICITY FOR<br>TRISOMY 21 (%) | 94.0    | 92.9  | 92.9  | 96.2  | 95.6  | 94.5  | 99.5                     | 96.7  | 99.5       | 98.9  | 99.5               | 98.4  | 96.7               | 98.9  | 99.5         | 99.5  |
| SENSITIVITY FOR<br>TRISOMY 18 (%) | 61.1    | 94.4  | 100.0 | 100.0 | 61.1  | 83.3  | 88.9                     | 100.0 | 88.9       | 100.0 | 88.9               | 100.0 | 72.2               | 100.0 | 83.3         | 100.0 |
| SPECIFICITY FOR<br>TRISOMY 18 (%) | 92.5    | 94.0  | 89.4  | 97.5  | 87.9  | 98.5  | 94.0                     | 99.0  | 94.0       | 99.0  | 95.0               | 98.0  | 92.5               | 99.0  | 94.5         | 99.0  |
| SENSITIVITY FOR<br>TRISOMY 13 (%) | 50.0    | 100.0 | 100.0 | 100.0 | 100.0 | 83.3  | 100.0                    | 100.0 | 100.0      | 100.0 | 83.3               | 100.0 | 83.3               | 100.0 | 83.3         | 100.0 |
| SPECIFICITY FOR<br>TRISOMY 13 (%) | 91.9    | 91.0  | 98.6  | 99.1  | 97.2  | 97.6  | 100.0                    | 99.1  | 100.0      | 99.5  | 100.5              | 99.1  | 99.1               | 99.1  | 100.0        | 99.5  |
| SENSITIVITY FOR<br>ANEUPLOIDY (%) | 93.1    | 100.0 | 98.3  | 100.0 | 96.6  | 100.0 | 98.3                     | 100.0 | 98.3       | 100.0 | 94.8               | 98.3  | 94.8               | 100.0 | 94.8         | 100.0 |
| SPECIFICITY FOR<br>ANEUPLOIDY (%) | 78.6    | 74.8  | 77.4  | 91.2  | 81.1  | 91.2  | 93.1                     | 93.7  | 93.1       | 96.9  | 94.3               | 94.3  | 88.1               | 96.2  | 93.7         | 97.5  |
| FALSE POSITIVES                   | 35      | 40    | 37    | 14    | 31    | 14    | 11                       | 10    | 11         | 5     | 10                 | 10    | 19                 | 6     | 10           | 4     |
| FALSE NEGATIVES                   | 3       | 0     | 0     | 0     | 1     | 0     | 1                        | 0     | 1          | 0     | 2                  | 0     | 3                  | 0     | 3            | 0     |
