# Supplementary material for: Noninvasive Prenatal Testing: Comparison of Two Mappers and Influence in the Diagnostic Yield
Source: Hindawi journal article supplement (doi:10.1155/2018/9498140), 2018-06-07
Supplement: f4 [file 9498140.f4.pdf]

Supplementary Table 4. Sensibility and specificity of the mappers according to the minimum millions of unique reads.

|                               | All the samples regardless of the number of reads |             | >1 Million reads |             | >2 Million reads |             | >3 Million reads |             | >4 Million reads |             |
|-------------------------------|---------------------------------------------------|-------------|------------------|-------------|------------------|-------------|------------------|-------------|------------------|-------------|
|                               | TMAP                                              | HPG Aligner | TMAP             | HPG Aligner | TMAP             | HPG Aligner | TMAP             | HPG Aligner | TMAP             | HPG Aligner |
| <b>Sensitivity Trisomy 21</b> | 97.06                                             | 100.00      | 97.06            | 100.00      | 97.06            | 100.00      | 96.88            | 100.00      | 96.77            | 100.00      |
| <b>Specificity Trisomy 21</b> | 99.46                                             | 98.39       | 99.45            | 98.91       | 99.44            | 98.88       | 99.42            | 98.84       | 99.39            | 98.79       |
| <b>Sensitivity Trisomy 18</b> | 88.89                                             | 100.00      | 88.89            | 100.00      | 88.89            | 100.00      | 88.24            | 100.00      | 88.24            | 100.00      |
| <b>Specificity Trisomy 18</b> | 94.06                                             | 99.01       | 93.97            | 98.99       | 94.33            | 98.97       | 94.12            | 98.93       | 93.85            | 98.88       |
| <b>Sensitivity Trisomy 13</b> | 100.00                                            | 100.00      | 100.00           | 100.00      | 100.00           | 100.00      | 100.00           | 100.00      | 100.00           | 100.00      |
| <b>Specificity Trisomy 13</b> | 100.00                                            | 99.53       | 100.00           | 99.53       | 100.00           | 99.51       | 100.00           | 99.49       | 100.00           | 99.47       |
| <b>Sensitivity aneuploidy</b> | 98.28                                             | 100.00      | 98.28            | 100.00      | 98.28            | 100.00      | 98.18            | 100.00      | 98.15            | 100.00      |
| <b>Specificity aneuploidy</b> | 93.21                                             | 96.30       | 93.08            | 96.86       | 93.51            | 96.75       | 93.29            | 96.64       | 92.96            | 96.48       |
